# Supplementary material for: Hemostatic Rescue with rFVIIa in Bernard–Soulier Syndrome Refractory to HLA-Matched Platelet Transfusion
Source: Research Square preprint supplement (doi:10.21203/rs.3.rs-8072327/v1), 2025-11-19
Supplement: Supplementary file 1 [file db4890ef4961463b0a35b744.xlsx]

## Sheet: Sheet1
	Table 1. Reported cases of rFVIIa use in BSS
	No.	Reference	Patient characteristics	Clinical setting	rFVIIa dose & schedule	Outcome
	1	Yüksel O et al., Dig Dis Sci. 2004;49(5):885-7.[11]	39-year-old female with BSS.	Severe recurrent gastrointestinal bleeding	Dose not precisely stated (for 5 days).	Hemostasis achieved after surgery; no thrombosis.
	2	Ozelo MC et al., Ann Hematol. 2005;84(12):816–822.[12]	Two sisters (15 and 24 years) with congenital BSS.	Severe epistaxis and menorrhagia	~90–122 µg/kg IV boluses (2–3 doses per episode).	Hemostasis achieved; no thrombosis.
	3	Hacihanefioglu A et al., Thromb Res. 2007;120(3):455–457.[13]	Two related patients (28 and 30 years) with confirmed BSS.	(1) Gastrointestinal bleeding (2) Menorrhagia + Tooth extraction	90 µg/kg pre-/peri-procedurally; repeated q2–3h as needed.	Effective control; no thromboembolic events.
	4	Tefre KL et al., Haemophilia. 2009;15(1):281–284.[14]	Two brothers (children/adolescents) with BSS.	(1) Knee and eye surgery (2) Dental extraction and Gastrointestinal bleeding	90 µg/kg q3–4h perioperatively.	Successful surgical hemostasis; uneventful recovery.
	5	Boppana S et al., J Med Cases. 2018;9(2):44–46.[15]	17-year-old female with BSS.	Perioperative bleeding	1 mg (~15 µg/kg) repeated every 2–3h intraoperatively.	Hemostasis achieved; no thrombosis reported.
	6	Present case (Okamoto et al., 2025).	50-year-old male with BSS (HLA-matched platelet transfusion refractory)	Recurrent gluteal hematoma requiring four surgical evacuations	90 µg/kg q2h (Day 1) → q3h (Day 2,3,4) ; 32 total doses.	Definitive hemostasis; no further surgery; no thrombosis.
